# Supplementary material for: 1-Dimensional fiber-based field-effect transistors made by low-temperature photochemically activated sol–gel metal-oxide materials for electronic textiles
Source: Royal Society of Chemistry journal article supplement (doi:10.1039/c5ra21613c), 2016-01-01
Supplement: c5ra21613c1.pdf [file c5ra21613c1.pdf]

## Supporting Information

### 1-Dimensional Fiber-based Field-Effect Transistors made by Low-temperature Photochemically Activated Sol-Gel Metal-Oxide Materials for Electronic Textiles

Chang Jun Park<sup>a\*</sup>, Jae Sang Heo<sup>a\*</sup>, Kyung-Tae kim<sup>a</sup>, Gyengmin Yi<sup>a</sup>, Jingu Kang<sup>a</sup>  
Jong S. Park<sup>b</sup>, Yong-Hoon Kim<sup>c+</sup>, and Sung Kyu Park<sup>a+</sup>

<sup>a</sup> School of Electrical and Electronics Engineering, Chung-Ang University, Seoul, Korea

<sup>b</sup> Department of Organic Material Science and Engineering, Pusan National University, Pusan, Korea.

<sup>c</sup> School of Advanced Materials Science and Engineering and SKKU Advanced Institute of Nanotechnology (SAINT), Sungkyukwan University, Suwon, Korea.

<sup>+</sup> Corresponding authors. E-mail : [skpark@cau.ac.kr](mailto:skpark@cau.ac.kr) (S.K.P)

[yhkim76@skku.edu](mailto:yhkim76@skku.edu) (Y.H.K)

**Electrical characterization of InO<sub>x</sub> F-FETa**

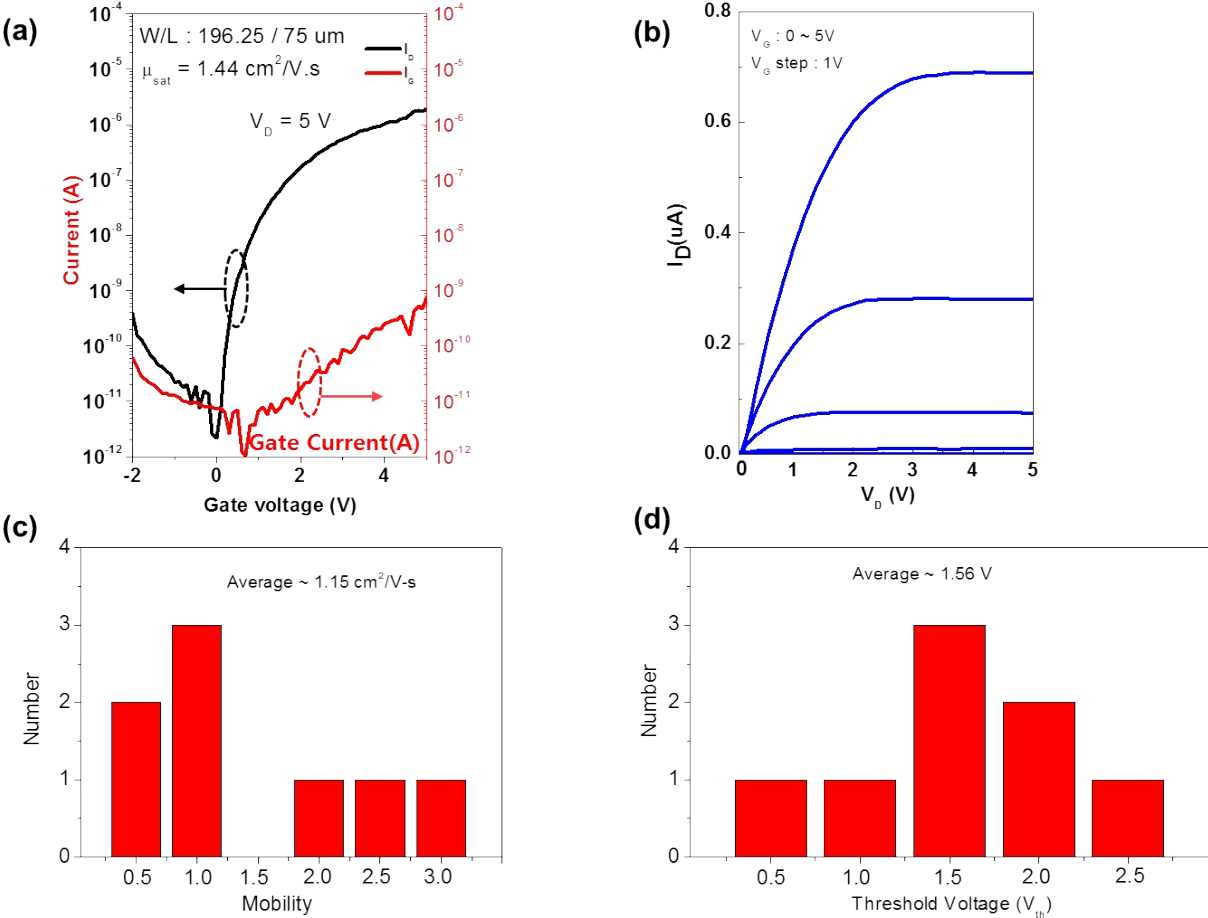

**Figure S1.** Electrical characteristics of IGZO F-FETs. Transfer characteristics of (a) and (b) Output characteristics of IGZO F-FETs. Distribution of (c) mobility and (d) threshold volatges of 8 devices

## Electrical characterization of planar-type InO<sub>x</sub> thin-film transistors

### Materials and methods

For planar-type devices, we fabricated spin-cast InO<sub>x</sub> thin-film transistors (TFTs) on a 50 μm-thick polyimide (PI) substrate. On the PI substrate, Cr/Au (5 nm/50 nm) gate electrode and AlO<sub>x</sub> gate dielectric layers were deposited sequentially. For active layer formation, InO<sub>x</sub> film was formed by spin coating and photochemical activation in N<sub>2</sub> atmosphere for 2h using high-density ultraviolet (UV) treatment system and indium-zinc oxide source/drain electrodes were deposited by using RF- magnetron sputtering. The channel width and length of the TFT were 100 μm and 50 μm, respectively.

### Electical performances

The fabricated InO<sub>x</sub> TFTs on a planar PI substrate showed an average field-effect mobility of 2.84 cm<sup>2</sup>/V·s. Also, the planar-type device exhibited n-type behavior and clean pinch-off, as shown in Figure S1.

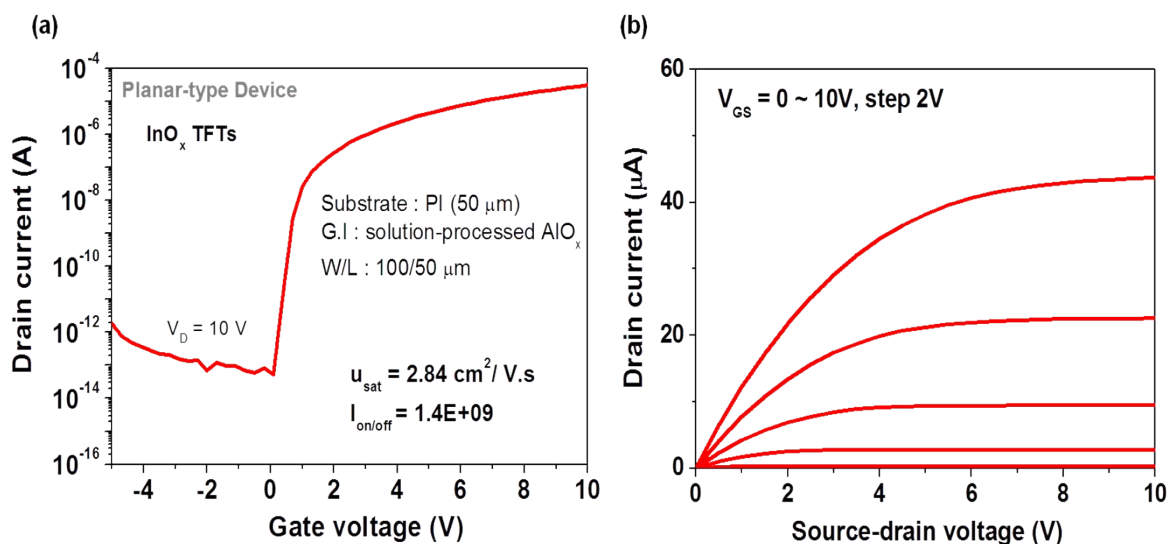

**Figure S2.** (a) Transfer and (b) output characteristics of InO<sub>x</sub> TFTs fabricated on planar PI substrate.

The electrical measurement set-up for fiber-based F-FETs

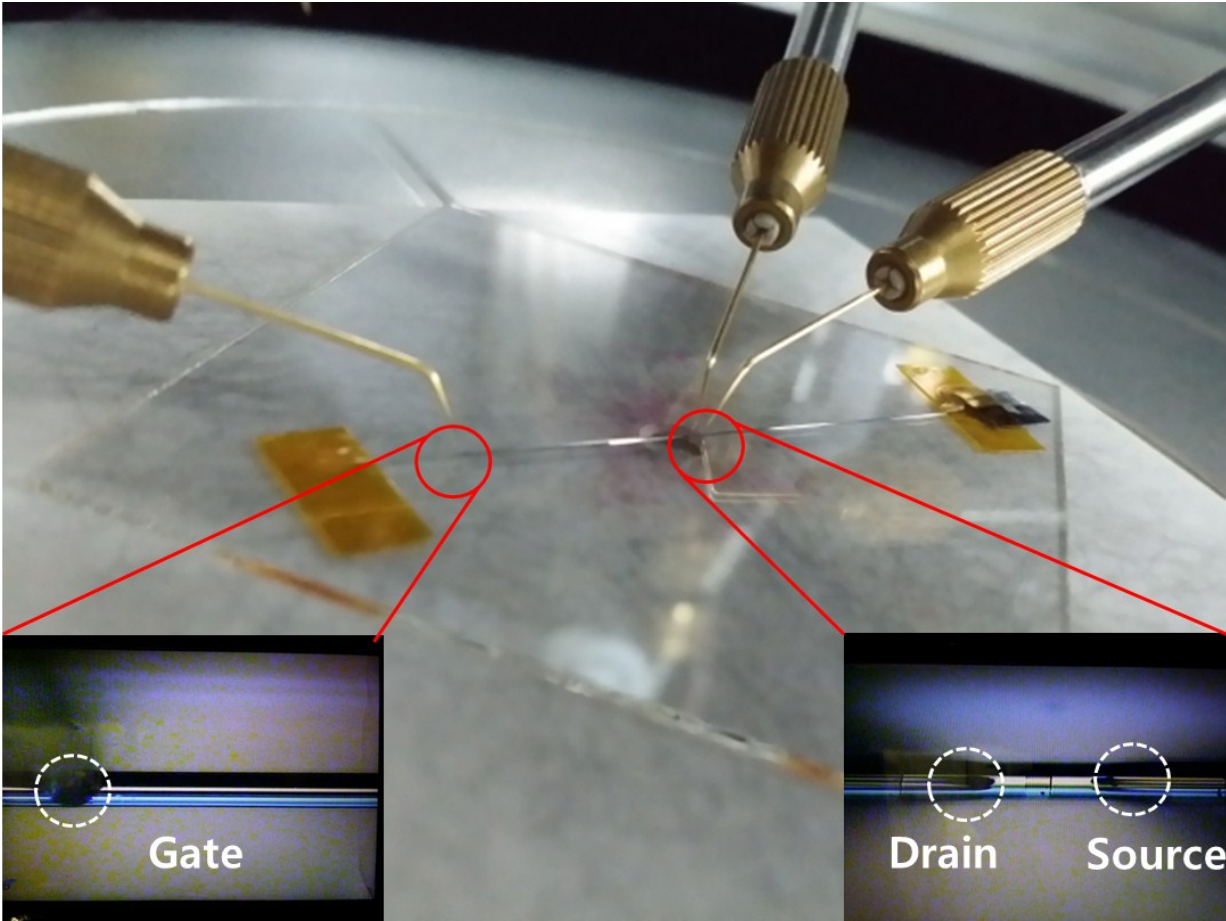

Figure S3. The electrical measurement set-up and probing for fiber-based F-FETs
